# Supplementary material for: Coupling Environmental Whole Mixture Toxicity Screening with Unbiased RNA-Seq Reveals Site-Specific Biological Responses in Zebrafish
Source: MDPI journal article supplement (doi:10.3390/toxics11030201), 2023-02-21
Supplement: s1 [file s1]

## **Supplemental information**

**Paper Title: Coupling environmental whole mixture toxicity screening with unbiased RNAseq reveals site-specific biological responses in zebrafish**

### **Contents:**

#### **Figures**

Supplementary Figure S1: 1% PHSS extract PAH Concentrations.

#### **Tables**

Supplementary Table S1: PAH names and structures included in 33 PAH quantitative method.

Supplementary Table S2: Summary of exposure scenarios and techniques for RNA acquisition and sequencing

Supplementary Table S3: Diagnostic PAH ratios

Supplementary Table S4: Differential Expression of genes named in paper

Supplementary Table S5: Comparison of OPAH gene expression to results from other studies

#### **Data**

Available on the supplementary data file

S1: PAH concentrations in PHSS extracts in pg/μL used to determine nominal exposure concentrations.

Data is also available on the Pacific northwest national lab data analytics portal under at:

<https://srp.pnnl.gov/samples>

sample ids:

6.5W-W-S

RM7W-LFT-W-S FDUP2

RM7W-LFT-W-S FDUP3

RM7W-LFT-W-S FDUP4

S2: The dose response data to each of the PHSD PSD extracts for each endpoint and concentration. Response values are the fraction of fish presenting with the endpoint out of 40 fish.

S3: The differential expression in log<sub>2</sub>FC and the P<sub>adj</sub> for each gene that is differentially expressed in at least one exposure scenario. Differential expressed genes were defined as |log<sub>2</sub>FC| > 0.5 and P<sub>adj</sub> < 0.05.

**Supplementary Figure S1: 1% PHSS extract PAH Concentrations.**

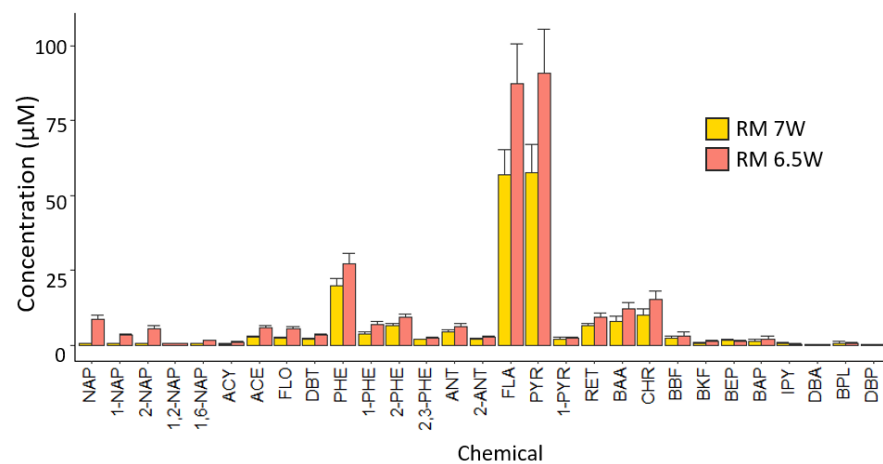

**Supplementary Figure S1.**

Individual Concentrations of each PAH at or above the LOQ determined by the 33 PAH method for RM 7W and RM 6.5W during Sep 2009 and Jul 2010 respectively. Concentrations report nominal levels in 1 % extract exposures.

**Supplementary Table S1: PAHs included in 33 PAH quantitative method: name and structure**

| Cas Number | Chemical name           | abbreviation | structure                                                                            |
|------------|-------------------------|--------------|--------------------------------------------------------------------------------------|
| 573-98-8   | 1,2-Dimethylnaphthalene | 1,2-NAP      | 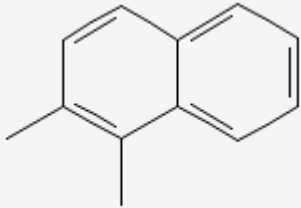   |
| 575-43-9   | 1,6-Dimethylnaphthalene | 1,6-NAP      |    |
| 90-12-0    | 1-Methylnaphthalene     | 1-NAP        |   |
| 832-69-9   | 1-Methylphenanthrene    | 1-PHE        |  |
| 2381-21-7  | 1-Methylpyrene          | 1-PYR        |  |
| 613-06-9   | 2,3-Dimethylanthracene  | 2,3-ANT      |  |

|           |                          |          |                                                                                      |
|-----------|--------------------------|----------|--------------------------------------------------------------------------------------|
| 613-12-7  | 2-Methylanthracene       | 2-ANT    | 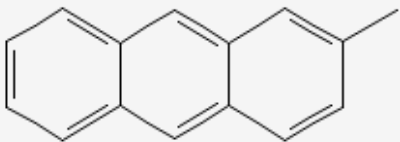   |
| 91-57-6   | 2-Methylnaphthalene      | 2-NAP    |    |
| 2531-84-2 | 2-Methylphenanthrene     | 2-PHE    |    |
| 1576-67-6 | 3,6-Dimethylphenanthrene | 2,3-PHE  |    |
| 1705-85-7 | 6-Methylchrysene         | 6-CHR    |   |
| 781-43-1  | 9,10-Dimethylanthracene  | 9,10-ANT |  |
| 779-02-2  | 9-Methylanthracene       | 9-ANT    |  |
| 483-65-8  | Retene                   | RET      |  |

|          |                      |     |                                                                                      |
|----------|----------------------|-----|--------------------------------------------------------------------------------------|
| 83-32-9  | Acenaphthene         | ACE | 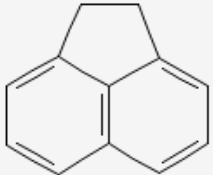   |
| 208-96-8 | Acenaphthylene       | ACY |    |
| 120-12-7 | Anthracene           | ANT |    |
| 56-55-3  | Benz[a]anthracene    | BAA |    |
| 50-32-8  | Benzo[a]pyrene       | BAP |   |
| 205-99-2 | Benzo[b]fluoranthene | BBF |  |
| 192-97-2 | Benzo[e]pyrene       | BEP |  |

|          |                       |     |                                                                                      |
|----------|-----------------------|-----|--------------------------------------------------------------------------------------|
| 191-24-2 | Benzo[g,h,i]perylene  | BPL | 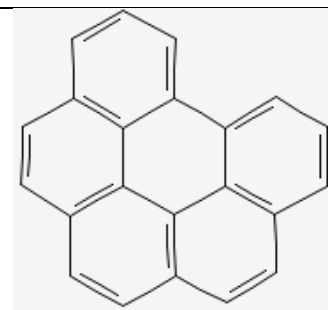   |
| 207-08-9 | Benzo[k]fluoranthene  | BKF |    |
| 218-01-9 | Chrysene              | CHR |    |
| 53-70-3  | Dibenz[a,h]anthracene | DBA |   |
| 191-30-0 | Dibenzo[a,l]pyrene    | DBP |  |
| 132-65-0 | Dibenzothiophene      | DBT |  |
| 206-44-0 | Fluoranthene          | FLA |  |
| 86-73-7  | Fluorene              | FLO |  |

|          |                        |     |                                                                                     |  |
|----------|------------------------|-----|-------------------------------------------------------------------------------------|--|
| 193-39-5 | Indeno[1,2,3-cd]pyrene | IPY | 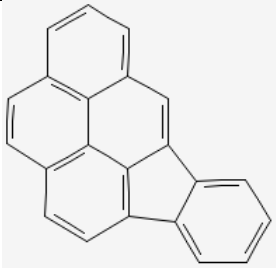  |  |
| 91-20-3  | Naphthalene            | NAP |   |  |
| 85-01-8  | Phenanthrene           | PHE |   |  |
| 129-00-0 | Pyrene                 | PYR |  |  |

**Supplementary Table S2: Summary of exposure scenarios and RNA isolation transcriptional analysis**

| Chemical                     | Abbreviation | Control Group | Concentration | Concentration type | RNA Isolation       | Library Prep | Sequencing Platform | N Samples | N samples final |
|------------------------------|--------------|---------------|---------------|--------------------|---------------------|--------------|---------------------|-----------|-----------------|
| Benzo[b]fluoranthene         | BbF          | A             | 50 uM         | EC80               | Direct-zol Miniprep | Scriptseq V2 | Illumina HISEQ 3000 | 3         | 2               |
| Benzo[k]fluoranthene         | BkF          | A             | 1.9 uM        | EC80               | Direct-zol Miniprep | Scriptseq V2 | Illumina HISEQ 3000 | 4         | 4               |
| Retene                       | Ret          | A             | 12.2 uM       | EC80               | Direct-zol Miniprep | Scriptseq V2 | Illumina HISEQ 3000 | 4         | 4               |
| DMSO                         | DMSO         | A             | 1%            | NA                 | Direct-zol Miniprep | Scriptseq V2 | Illumina HISEQ 3000 | 3         | 3               |
| Benz(a)anthracene-7,12-dione | BAAQ         | D             | 10 uM         | EC100              | Phenolguanadine     | PrepX        | Illumina HISEQ 2000 | 3         | 3               |
| Benzanthrone                 | BEZO         | D             | 10 uM         | EC100              | Phenolguanadine     | PrepX        | Illumina HISEQ 2000 | 3         | 3               |
| Phenanthrene-quinone         | PHEQ         | D             | 1.2 uM        | EC100              | Phenolguanadine     | PrepX        | Illumina HISEQ 2000 | 3         | 3               |
| RM 6.5W Jul 2010             | RM 6.5W      | D             | 0.75%         | NA                 | Phenolguanadine     | PrepX        | Illumina HISEQ 2000 | 3         | 2               |
| RM 7W Sep 2009               | RM 7W        | D             | 0.75%         | NA                 | Phenolguanadine     | PrepX        | Illumina HISEQ 2000 | 3         | 3               |
| DMSO                         | DMSO         | D             | 1%            | NA                 | Phenolguanadine     | PrepX        | Illumina HISEQ 2000 | 3         | 3               |



**Supplementary Table S3: Diagnostic PAH ratios**

| <b>chemicals</b> | <b>RM6W ratio</b> | <b>RM7W ratio</b> |
|------------------|-------------------|-------------------|
| FLA/PYR          | $1.0 \pm 0.3$     | $1.0 \pm 0.2$     |
| RET/CHR          | $0.6 \pm 0.2$     | $0.6 \pm 0.2$     |
| PHE/ANTH         | $4 \pm 1$         | $5 \pm 1$         |

**Supplementary Table S4: Differential Expression of genes named in paper**

| <i>symbol</i>    | <b>RIV6</b> | <b>RIV7</b> | <b>Bbf</b> | <b>Bkf</b> | <b>Ret</b> | <b>BEZO</b> | <b>BAAQ</b> | <b>PHEQ</b> |
|------------------|-------------|-------------|------------|------------|------------|-------------|-------------|-------------|
| <i>cyp1a</i>     | 7.92*       | 7.55*       | 5.83*      | 7.82*      | 7.6*       | 1.7*        | 7.63*       | 0.94*       |
| <i>ptgr1.2</i>   | 6.34*       | 5.58*       | 1          | -2.66      | 2.56       | 0.54        | 4.01*       | 0.68        |
| <i>gstp2</i>     | 5.39*       | 5.9*        | 1.47       | 1.28       | 4.34*      | 2.1*        | 3.3*        | 0.68        |
| <i>ahrra</i>     | 5.36*       | 5.07*       | 2.5*       | 4.78*      | 5.44*      | 2.4*        | 5.32*       | -0.95       |
| <i>wfikkn1</i>   | 5*          | 4.92*       | 2.23*      | 3.7*       | 4.49*      | 1.72        | 4.63*       | 0.3         |
| <i>cyp1c1</i>    | 4.63*       | 4.36*       | 3.1*       | 4.02*      | 5.24*      | 1.17*       | 4.88*       | 0.44        |
| <i>cyp1c2</i>    | 4.63*       | 4.17*       | 2.16*      | 3.16*      | 4.61*      | 0.73*       | 4.49*       | 0.7*        |
| <i>ahrrb</i>     | 4.47*       | 3.95*       | 2.63*      | 4.06*      | 4.41*      | 0.65        | 4.06*       | 0.01        |
| <i>cyp1b1</i>    | 4.41*       | 4.1*        | 1.49*      | 3.33*      | 2.67*      | 0.17        | 3.61*       | 0.58        |
| <i>arf4b</i>     | 4.25*       | 3.75*       | 0.8        | -0.59      | 0.71       | 0.57        | 0.74        | 0.53        |
| <i>nfe2l2b</i>   | 2.92*       | 2.35*       | 0.93*      | 1.59*      | 1.08*      | 1.01*       | 1.43*       | 0.02        |
| <i>ugt1ab</i>    | 2.2*        | 2.33*       | 1.17*      | 1.19*      | 1.68*      | 0.71*       | 1.16*       | 0.38        |
| <i>foxq1a</i>    | 1.68*       | 1.46*       | 1.71*      | 3.22*      | 2.43*      | 0.11        | 1.7*        | -0.21       |
| <i>tnni1d</i>    | -2.18*      | -0.17       | -1.02      | -0.79      | -1.02*     | -0.06       | -0.48       | 0.13        |
| <i>loxa</i>      | -2.24*      | -1.35       | -0.74      | -1.23      | -0.85      | -1.08       | -1.76       | -0.31       |
| <i>arr3a</i>     | -2.25*      | -0.86*      | -0.07      | 0.21       | 0.31       | -1.62*      | -0.53       | -1.26*      |
| <i>rho</i>       | -2.63*      | -1.63*      | -0.37      | 0          | 0          | -0.7        | -0.3        | -1.82*      |
| <i>rom1b</i>     | -3.55*      | -1.74*      | 0.24       | 0.65       | -0.05      | -1.3        | -0.32       | -0.87       |
| <i>crygm2d11</i> | -3.74*      | -1.42*      | -0.06      | 0.18       | -0.54      | -3.52*      | -0.95       | -0.67       |
| <i>crybgx</i>    | -4.21*      | -1.84*      | 0.97       | 0.77       | -2.12      | -2.18*      | -0.64       | -1.66       |
| <i>myl2b</i>     | -5.72*      | -1.01       | -1.2       | 0.52       | -1.96      | -1.41       | -0.62       | -0.83       |
| <i>opn1sw1</i>   | -6.63*      | -2.28*      | 0.2        | -0.68      | -0.09      | -2.93*      | -1.16       | -2.47       |

Gene expression changes called out throughout the study. All values express log<sub>2</sub>FCc. Asterisks indicate  $p_{\text{adj}} \leq 0.05$ .

**Supplementary Table S5: Comparison of OPAH gene expression to results from other studies**

| study     | present study        |           |              | Knecht et al. 2013   |            |            | Misaki et al. 2007 |
|-----------|----------------------|-----------|--------------|----------------------|------------|------------|--------------------|
| model     | developing sebrafish |           |              | developing zebrafish |            |            | hepg2 cells        |
| technique | RNAseq               |           |              | qRT_PCR              |            |            | qRT_PCR            |
| chemical  | BEZO (10uM)          | BAAQ (uM) | PHEQ (1.2uM) | BEZO (5uM)           | BAAQ (5uM) | PHEQ (1uM) | BAAQ               |
| cyp1a     | 1.76*                | 7.7*      | 0.94*        | 2.5*                 | 9*         | 1*         | 4.3*               |
| cyp1b     | 0.174                | 3.61*     | 0.579        | <0.5*                | 4*         | 0          | 2*                 |
| cyp1c     | 1.174*               | 4.883*    | 0.439        | 1*                   | 5*         | 0          |                    |
| cyp1c2    | 0.735*               | 4.487*    | 0.698*       | 1*                   | 4*         | 0          |                    |
| gpx1a     | 0.093                | 1.004*    | -0.024       | 1.27                 | 2.84*      | 1.01       |                    |
| gpx7      | -0.229               | -0.634*   | 0.021        | 0.994                | 1.1        | 0.95       |                    |
| gstp1     | 1.379*               | 2.401*    | 0.322        | 3.16*                | 12.7*      | 0.981      |                    |
| gstp2     | 2.098*               | 3.296*    | 0.679        | 2.7*                 | 10.3*      | 0.83       |                    |
| gclm      | 0.12                 | 0.533     | -0.082       | 1.53                 | 2.3*       | 0.906      |                    |
| nrfx      | 1.014*               | 1.43*     | 0.015        | 1.06                 | 1.53*      | 1.37*      |                    |
| nqo1      | -0.066               | 0.437     | 0.002        | 1.09                 | 2.16*      | 1.55       |                    |
| hmox      | 0.569*               | 0.014     | 0.104        | 2.13*                | 2.03*      | 3.32*      |                    |
| akr1c1    | 1.174*               | 4.883*    | 0.439        |                      |            |            | 2.3*               |
| nqo1      | -0.066               | 0.437     | 0.002        |                      |            |            | 1*                 |

Gene expression data from studies utilizing BEZO, BAAQ, and PHEQ. All expression changes are expressed in log<sub>2</sub>FC. Asterisks indicate  $p_{adj} \leq 0.05$ . Green Shading indicates conserved significance and fold change directionality across studies.
